# Supplementary material for: Experience of point-of-care HbA1c testing in the English National Health Service Diabetes Prevention Programme: an observational study
Source: HighWire-hosted journal article supplement (doi:10.1136/bmjdrc-2020-001703), 2020-12-01
Supplement: bmjdrc-2020-001703supp001_data_supplement.pdf [file bmjdrc-2020-001703supp001_data_supplement.pdf]

## Supplementary material

**Table S1: Mean difference in HbA1c between referral and Initial Assessment, pairwise combinations of pathways using a Bonferroni post-hoc correction**

|                            | Ingeus Inhouse  | Ingeus Lloyds  | Living Well Taking Control | ICS Health and Wellbeing | Reed In-house |
|----------------------------|-----------------|----------------|----------------------------|--------------------------|---------------|
| Ingeus Lloyds              | -2.05<br><0.001 |                |                            |                          |               |
| Living Well Taking Control | -0.67<br><0.001 | 1.38<br><0.001 |                            |                          |               |
| ICS Health and Wellbeing   | 0.42<br>0.003   | 2.47<br><0.001 | 1.09<br><0.001             |                          |               |
| Reed Momenta In-house      | -0.68<br><0.001 | 1.37<br><0.001 | -0.01<br>1.00              | -1.10<br>0.00            |               |
| Reed Momenta Lloyds        | -0.68<br>0.10   | 1.37<br><0.001 | -0.02<br>1.00              | -1.10<br><0.001          | 0.00<br>1.00  |

**Table S2: Mean difference in HbA1c between referral and Initial Assessment, pairwise combinations of device using a Bonferroni post-hoc correction**

|             | A1c Now +      | Afinion        |
|-------------|----------------|----------------|
| Afinion     | 0.19<br><0.001 |                |
| DCA Vantage | 1.26<br><0.001 | 1.07<br><0.001 |

**Table S3: Difference between laboratory measured Hba1c at Referral and Point-of-Care re-measurement at Initial Assessment by device (N=61,623), mixed effects linear regression**

|                                              |                        | Coefficient | 95% lower CI | 95% upper CI | Standard error | P value |
|----------------------------------------------|------------------------|-------------|--------------|--------------|----------------|---------|
|                                              | Referral HbA1c Reading | -0.20       | -0.22        | -0.18        | 0.01           | <0.001  |
| Pathway                                      | DCA Vantage            |             |              |              |                |         |
|                                              | A1c Now + Afinion      | -1.67       | -2.00        | -1.34        | 0.17           | <0.001  |
| Sex                                          | Male                   | -0.87       | -1.39        | -0.34        | 0.27           | <0.001  |
|                                              | Female                 | 0.00        | -0.06        | 0.07         | 0.03           | 0.92    |
|                                              | Indeterminate          | 0.83        | -0.36        | 2.01         | 0.61           | 0.17    |
| Age group                                    | <40                    |             |              |              |                |         |
|                                              | 40-64                  | 0.34        | 0.16         | 0.52         | 0.09           | <0.001  |
|                                              | 65-74                  | 0.38        | 0.19         | 0.56         | 0.10           | <0.001  |
|                                              | 75+                    | 0.42        | 0.22         | 0.61         | 0.10           | <0.001  |
| Ethnicity                                    | White                  |             |              |              |                |         |
|                                              | Asian                  | 0.36        | 0.25         | 0.47         | 0.06           | <0.001  |
|                                              | Black                  | 0.93        | 0.79         | 1.06         | 0.07           | <0.001  |
|                                              | Mixed                  | 0.63        | 0.38         | 0.88         | 0.13           | <0.001  |
|                                              | Other                  | 0.16        | -0.16        | 0.48         | 0.16           | 0.33    |
| Deprivation                                  | IMD 1 (most deprived)  |             |              |              |                |         |
|                                              | IMD 2                  | -0.12       | -0.22        | -0.01        | 0.05           | 0.03    |
|                                              | IMD 3                  | -0.19       | -0.29        | -0.08        | 0.05           | <0.001  |
|                                              | IMD 4                  | -0.28       | -0.39        | -0.17        | 0.05           | <0.001  |
|                                              | IMD 5 (least deprived) | -0.33       | -0.44        | -0.22        | 0.06           | <0.001  |
| Number of days between referral and IA HbA1c | <28 days               |             |              |              |                |         |
|                                              | 28-55 days             | -0.72       | -1.06        | -0.38        | 0.17           | <0.001  |
|                                              | 56-83 days             | -0.98       | -1.31        | -0.65        | 0.17           | <0.001  |
|                                              | 84-111 days            | -1.51       | -1.83        | -1.20        | 0.16           | <0.001  |
|                                              | 112-139 days           | -1.31       | -1.63        | -0.99        | 0.16           | <0.001  |
|                                              | 140-167 days           | -1.31       | -1.64        | -0.99        | 0.16           | <0.001  |
|                                              | 168-195 days           | -1.18       | -1.50        | -0.85        | 0.17           | <0.001  |
|                                              | 196-223 days           | -1.09       | -1.42        | -0.77        | 0.17           | <0.001  |
|                                              | 224-251 days           | -1.13       | -1.45        | -0.80        | 0.17           | <0.001  |
|                                              | 252-279 days           | -1.06       | -1.39        | -0.73        | 0.17           | <0.001  |
|                                              | 280-307 days           | -1.00       | -1.33        | -0.66        | 0.17           | <0.001  |
|                                              | 308-335 days           | -0.89       | -1.23        | -0.55        | 0.17           | <0.001  |
|                                              | 336-363 days           | -0.68       | -1.02        | -0.33        | 0.17           | <0.001  |
|                                              | 363-739 days           | -0.81       | -1.13        | -0.49        | 0.16           | <0.001  |
| >730 days                                    | -0.83                  | -1.70       | 0.05         | 0.45         | <0.001         |         |
|                                              | Constant               | 7.66        | 6.66         | 8.67         | 0.51           | 0       |

| Random-effects Parameters | Estimate | Std. Err. | 95% lower | 95% upper |
|---------------------------|----------|-----------|-----------|-----------|
|---------------------------|----------|-----------|-----------|-----------|

|                               |       |      |       |       |
|-------------------------------|-------|------|-------|-------|
| Local referral area: Identity |       |      |       |       |
| var(_cons)                    | 0.69  | 0.13 | 0.47  | 1.01  |
| var(Residual)                 | 15.69 | 0.09 | 15.52 | 15.86 |

LR test vs. linear model:  $\chi^2(01) = 1684.27$  Prob>= $\chi^2$ =<0.001

**Table S4: Difference between laboratory measured HbA1c at Referral and Point-of-Care re-measurement at Initial Assessment by device for the sub set of participants with a weight recorded at referral (N=16,507), mixed effects linear regression**

|                                              |                        | Coefficient | 95% lower CI | 95% upper CI | Standard error | P value |
|----------------------------------------------|------------------------|-------------|--------------|--------------|----------------|---------|
|                                              | Change in weight       | 0.06        | 0.05         | 0.07         | 0.01           | <0.001  |
|                                              | Referral HbA1C Reading | -0.23       | -0.28        | -0.19        | 0.02           | <0.001  |
| Device                                       | A1c Now+               |             |              |              |                |         |
|                                              | Afinion                | 0.86        | 0.23         | 1.49         | 0.32           | 0.01    |
|                                              | DCA Vantage            | 0.66        | -0.88        | 2.19         | 0.78           | 0.4     |
| Sex                                          | Male                   |             |              |              |                |         |
|                                              | Female                 | 0.02        | -0.12        | 0.16         | 0.07           | 0.8     |
|                                              | Indeterminate          | 0.34        | -1.48        | 2.15         | 0.93           | 0.72    |
| Age group                                    | <40                    |             |              |              |                |         |
|                                              | 40-64                  | 0.14        | -0.26        | 0.54         | 0.20           | 0.5     |
|                                              | 65-74                  | 0.04        | -0.38        | 0.46         | 0.21           | 0.85    |
|                                              | 75+                    | 0.12        | -0.31        | 0.55         | 0.22           | 0.59    |
| Ethnicity                                    | White                  |             |              |              |                |         |
|                                              | Asian                  | 0.73        | 0.47         | 0.98         | 0.13           | <0.001  |
|                                              | Black                  | 1.64        | 1.32         | 1.95         | 0.16           | <0.001  |
|                                              | Mixed                  | 1.03        | 0.29         | 1.76         | 0.38           | 0.01    |
|                                              | Other                  | 0.46        | -0.02        | 0.93         | 0.24           | 0.06    |
| Deprivation                                  | IMD 1 (most deprived)  |             |              |              |                |         |
|                                              | IMD 2                  | -0.11       | -0.33        | 0.11         | 0.11           | 0.32    |
|                                              | IMD 3                  | -0.29       | -0.53        | -0.06        | 0.12           | 0.01    |
|                                              | IMD 4                  | -0.50       | -0.73        | -0.27        | 0.12           | <0.001  |
|                                              | IMD 5 (least deprived) | -0.50       | -0.73        | -0.26        | 0.12           | <0.001  |
| Number of days between referral and IA HbA1c | <28 days               |             |              |              |                |         |
|                                              | 28-55 days             | -1.30       | -1.94        | -0.67        | 0.32           | <0.001  |
|                                              | 56-83 days             | -1.15       | -1.77        | -0.53        | 0.32           | <0.001  |
|                                              | 84-111 days            | -1.36       | -1.96        | -0.76        | 0.31           | <0.001  |
|                                              | 112-139 days           | -0.90       | -1.50        | -0.30        | 0.31           | 0.003   |
|                                              | 140-167 days           | -1.05       | -1.65        | -0.44        | 0.31           | 0.001   |
|                                              | 168-195 days           | -0.90       | -1.51        | -0.29        | 0.31           | 0.004   |
|                                              | 196-223 days           | -0.87       | -1.49        | -0.25        | 0.31           | 0.006   |
|                                              | 224-251 days           | -0.91       | -1.53        | -0.29        | 0.32           | 0.004   |
|                                              | 252-279 days           | -0.93       | -1.56        | -0.31        | 0.32           | 0.003   |
|                                              | 280-307 days           | -0.75       | -1.38        | -0.11        | 0.32           | 0.021   |
|                                              | 308-335 days           | -0.84       | -1.49        | -0.20        | 0.33           | 0.010   |
|                                              | 336-363 days           | -0.77       | -1.42        | -0.12        | 0.33           | 0.020   |
|                                              | 363-739 days           | -0.60       | -1.21        | 0.01         | 0.31           | 0.053   |
| >730 days                                    | 0.91                   | -1.17       | 3.00         | 1.06         | 0.390          |         |

|                                               |              |       |       |      |       |       |
|-----------------------------------------------|--------------|-------|-------|------|-------|-------|
| Number of days between referral and IA weight | <28 days     |       |       |      |       |       |
|                                               | 28-55 days   | -0.20 | -0.43 | 0.02 | 0.11  | 0.076 |
|                                               | 56-83 days   | 0.11  | -0.17 | 0.39 | 0.14  | 0.427 |
|                                               | 84-111 days  | -0.09 | -0.39 | 0.21 | 0.15  | 0.570 |
|                                               | 112-139 days | -0.15 | -0.49 | 0.19 | 0.17  | 0.398 |
|                                               | 140-167 days | -0.35 | -0.73 | 0.04 | 0.20  | 0.079 |
|                                               | 168-195 days | -0.37 | -0.81 | 0.07 | 0.23  | 0.101 |
|                                               | 196-223 days | -0.44 | -0.89 | 0.01 | 0.23  | 0.054 |
|                                               | 224-251 days | -0.11 | -0.62 | 0.40 | 0.26  | 0.684 |
|                                               | 252-279 days | -0.43 | -0.97 | 0.12 | 0.28  | 0.124 |
|                                               | 280-307 days | 0.09  | -0.50 | 0.67 | 0.30  | 0.772 |
|                                               | 308-335 days | -0.37 | -0.99 | 0.25 | 0.32  | 0.245 |
|                                               | 336-363 days | -0.38 | -1.11 | 0.36 | 0.37  | 0.313 |
|                                               | 363-739 days | 0.11  | -0.26 | 0.49 | 0.19  | 0.558 |
|                                               | >730 days    | -0.33 | -0.74 | 0.08 | 0.21  | 0.119 |
| Constant                                      | 7.96         | 5.79  | 10.13 | 1.11 | 0.000 |       |

| Random-effects Parameters     | Estimate | Std. Err. | 95% lower | 95% upper |
|-------------------------------|----------|-----------|-----------|-----------|
| Local referral area: Identity |          |           |           |           |
| var(_cons)                    | 0.37     | 0.14      | 0.18      | 0.78      |
| var(Residual)                 | 20.5     | 0.23      | 20.1      | 21.0      |

LR test vs. linear model:  $\chi^2(01) = 201.47$  Prob>= $\chi^2$ =<0.001

**Table S5: Difference in HbA1c between laboratory measured HbA1c at Referral and Point-of-care re-measurement at Initial Assessment by pathway using multiple imputation data (N=73,703), mixed effects linear regression**

|                                              |                                        | Coefficient | 95% CI lower | 95% CI upper | P value |
|----------------------------------------------|----------------------------------------|-------------|--------------|--------------|---------|
| Referral HbA1c Reading                       |                                        | -0.19       | -0.21        | -0.17        | <0.001  |
| Pathway                                      | ICS Health and Wellbeing (DCA Vantage) |             |              |              |         |
|                                              | Ingeus Inhouse ( DCA Vantage)          | -0.24       | -0.79        | 0.30         | 0.38    |
|                                              | Ingeus Lloyds (A1c Now+)               | -2.54       | -3.08        | -2.01        | <0.001  |
|                                              | Living Well Taking Control (Afinion)   | -0.88       | -1.39        | -0.37        | <0.001  |
|                                              | Reed Inhouse (A1c Now+)                | -1.06       | -1.64        | -0.49        | <0.001  |
|                                              | Reed Lloyds (A1c Now+)                 | -1.99       | -2.72        | -1.26        | <0.001  |
| Age group                                    | <40                                    |             |              |              |         |
|                                              | 40-64                                  | 0.38        | 0.21         | 0.55         | <0.001  |
|                                              | 65-74                                  | 0.40        | 0.23         | 0.58         | <0.001  |
|                                              | 75+                                    | 0.46        | 0.28         | 0.64         | <0.001  |
| Sex                                          | Male                                   |             |              |              |         |
|                                              | Female                                 | 0.00        | -0.07        | 0.06         | 0.87    |
| Ethnicity                                    | White                                  |             |              |              |         |
|                                              | Asian                                  | 0.44        | 0.31         | 0.57         | <0.001  |
|                                              | Black                                  | 1.04        | 0.88         | 1.20         | <0.001  |
|                                              | Mixed                                  | 0.75        | 0.46         | 1.05         | <0.001  |
|                                              | Other                                  | 0.16        | -0.22        | 0.54         | 0.41    |
| Deprivation                                  | IMD 1 (most deprived)                  |             |              |              |         |
|                                              | IMD 2                                  | -0.11       | -0.21        | -0.01        | 0.03    |
|                                              | IMD 3                                  | -0.19       | -0.29        | -0.09        | <0.001  |
|                                              | IMD 4                                  | -0.28       | -0.38        | -0.17        | <0.001  |
|                                              | IMD 5 (least deprived)                 | -0.33       | -0.44        | -0.23        | <0.001  |
| Number of days between referral and IA HbA1c | <28 days                               |             |              |              |         |
|                                              | 28-55 days                             | -0.61       | -0.93        | -0.30        | <0.001  |
|                                              | 56-83 days                             | -0.87       | -1.18        | -0.57        | <0.001  |
|                                              | 84-111 days                            | -1.37       | -1.67        | -1.08        | <0.001  |
|                                              | 112-139 days                           | -1.24       | -1.53        | -0.94        | <0.001  |
|                                              | 140-167 days                           | -1.13       | -1.43        | -0.83        | <0.001  |
|                                              | 168-195 days                           | -1.07       | -1.37        | -0.77        | <0.001  |
|                                              | 196-223 days                           | -0.93       | -1.23        | -0.62        | <0.001  |
|                                              | 224-251 days                           | -0.95       | -1.25        | -0.64        | <0.001  |
|                                              | 252-279 days                           | -0.89       | -1.20        | -0.58        | <0.001  |
|                                              | 280-307 days                           | -0.82       | -1.13        | -0.51        | <0.001  |
|                                              | 308-335 days                           | -0.74       | -1.06        | -0.43        | <0.001  |
|                                              | 336-363 days                           | -0.59       | -0.91        | -0.27        | <0.001  |
|                                              | 363-739 days                           | -0.72       | -1.02        | -0.42        | <0.001  |
|                                              | >730 days                              | -0.74       | -1.59        | 0.12         | 0.09    |
| constant                                     | 7.35                                   | 6.38        | 8.32         | <0.001       |         |

| Random-effects Parameters     | Estimate | Std. Err. | 95% lower | 95% upper |
|-------------------------------|----------|-----------|-----------|-----------|
| Local referral area: Identity |          |           |           |           |
| sd(_cons)                     | 0.76     | 0.07      | 0.63      | 0.91      |
| sd(Residual)                  | 4.1      | 0.01      | 4.13      | 4.17      |

**Table S6: Difference in Hba1c between laboratory measured HbA1c at Referral and Point-of-care re-measurement at Initial Assessment by device using multiple imputation data (N=73,703), mixed effects linear regression**

|                                              |                        | Coefficient | 95% CI lower | 95% CI upper | P value |
|----------------------------------------------|------------------------|-------------|--------------|--------------|---------|
|                                              | Referral HbA1c Reading | -0.19       | -0.21        | -0.17        | <0.001  |
| Pathway                                      | DCA Vantage            |             |              |              |         |
|                                              | A1c Now + Afinion      | -2.13       | -2.41        | -1.86        | <0.001  |
| Sex                                          | Male                   | -0.98       | -1.52        | -0.44        | <0.001  |
|                                              | Female                 | 0.00        | -0.06        | 0.06         | 0.89    |
| Age group                                    | <40                    |             |              |              |         |
|                                              | 40-64                  | 0.38        | 0.21         | 0.55         | <0.001  |
|                                              | 65-74                  | 0.40        | 0.23         | 0.58         | <0.001  |
|                                              | 75+                    | 0.46        | 0.28         | 0.65         | <0.001  |
| Ethnicity                                    | White                  |             |              |              |         |
|                                              | Asian                  | 0.44        | 0.31         | 0.57         | <0.001  |
|                                              | Black                  | 1.03        | 0.87         | 1.19         | <0.001  |
|                                              | Mixed                  | 0.75        | 0.46         | 1.04         | <0.001  |
|                                              | Other                  | 0.17        | -0.22        | 0.55         | 0.40    |
| Deprivation                                  | IMD 1 (most deprived)  |             |              |              |         |
|                                              | IMD 2                  | -0.11       | -0.21        | -0.02        | 0.02    |
|                                              | IMD 3                  | -0.19       | -0.29        | -0.08        | <0.001  |
|                                              | IMD 4                  | -0.28       | -0.38        | -0.17        | <0.001  |
|                                              | IMD 5 (least deprived) | -0.33       | -0.44        | -0.22        | <0.001  |
| Number of days between referral and IA HbA1c | <28 days               |             |              |              |         |
|                                              | 28-55 days             | -0.61       | -0.93        | -0.30        | <0.001  |
|                                              | 56-83 days             | -0.88       | -1.18        | -0.57        | <0.001  |
|                                              | 84-111 days            | -1.38       | -1.67        | -1.08        | <0.001  |
|                                              | 112-139 days           | -1.24       | -1.54        | -0.94        | <0.001  |
|                                              | 140-167 days           | -1.14       | -1.44        | -0.84        | <0.001  |
|                                              | 168-195 days           | -1.08       | -1.38        | -0.78        | <0.001  |
|                                              | 196-223 days           | -0.93       | -1.24        | -0.63        | <0.001  |
|                                              | 224-251 days           | -0.95       | -1.26        | -0.65        | <0.001  |
|                                              | 252-279 days           | -0.90       | -1.21        | -0.59        | <0.001  |
|                                              | 280-307 days           | -0.83       | -1.14        | -0.51        | <0.001  |
|                                              | 308-335 days           | -0.75       | -1.06        | -0.43        | <0.001  |
|                                              | 336-363 days           | -0.59       | -0.91        | -0.27        | <0.001  |
|                                              | 363-739 days           | -0.72       | -1.02        | -0.42        | <0.001  |
|                                              | >730 days              | -0.72       | -1.58        | 0.13         | 0.10    |
|                                              | Constant               | 7.46        | 6.50         | 8.42         | <0.001  |



| Random-effects Parameters     | Estimate | Std. Err. | [95%<br>Conf. | Interval] |
|-------------------------------|----------|-----------|---------------|-----------|
| Local referral area: Identity |          |           |               |           |
| sd(_cons)                     | 0.86     | 0.08      | 0.71          | 1.04      |
| sd(Residual)                  | 4.15     | 0.01      | 4.13          | 4.17      |

**Table S7: Difference between laboratory measured HbA1c at Referral and Point-of-Care re-measurement at Initial Assessment by device using multiple imputation for the sub set of participants with a weight recorded at referral (N=20,576), mixed effects linear regression**

|                                              |                        | Coefficient | 95% CI lower | 95% CI upper | P value |
|----------------------------------------------|------------------------|-------------|--------------|--------------|---------|
|                                              | Change in weight       | 0.06        | 0.05         | 0.07         | <0.001  |
|                                              | Referral HbA1C Reading | -0.24       | -0.28        | -0.20        | <0.001  |
| Device                                       | A1c Now+               |             |              |              |         |
|                                              | Afinion                | 0.92        | 0.30         | 1.53         | <0.001  |
|                                              | DCA Vantage            | 0.59        | -0.91        | 2.09         | 0.44    |
| Sex                                          | Male                   |             |              |              |         |
|                                              | Female                 | -0.03       | -0.16        | 0.10         | 0.64    |
| Age group                                    | <40                    |             |              |              |         |
|                                              | 40-64                  | 0.13        | -0.24        | 0.50         | 0.49    |
|                                              | 65-74                  | 0.01        | -0.37        | 0.40         | 0.95    |
|                                              | 75+                    | 0.08        | -0.32        | 0.47         | 0.71    |
| Ethnicity                                    | White                  |             |              |              |         |
|                                              | Asian                  | 0.71        | 0.44         | 0.98         | <0.001  |
|                                              | Black                  | 1.53        | 1.22         | 1.85         | <0.001  |
|                                              | Mixed                  | 1.02        | 0.24         | 1.80         | 0.01    |
|                                              | Other                  | 0.43        | -0.03        | 0.90         | 0.07    |
| Deprivation                                  | IMD 1 (most deprived)  |             |              |              |         |
|                                              | IMD 2                  | -0.09       | -0.29        | 0.11         | 0.39    |
|                                              | IMD 3                  | -0.28       | -0.49        | -0.06        | 0.01    |
|                                              | IMD 4                  | -0.44       | -0.65        | -0.23        | <0.001  |
|                                              | IMD 5 (least deprived) | -0.41       | -0.62        | -0.19        | <0.001  |
| Number of days between referral and IA HbA1c | <28 days               |             |              |              |         |
|                                              | 28-55 days             | -0.91       | -1.48        | -0.34        | <0.001  |
|                                              | 56-83 days             | -0.86       | -1.42        | -0.30        | <0.001  |
|                                              | 84-111 days            | -1.06       | -1.60        | -0.52        | <0.001  |
|                                              | 112-139 days           | -0.73       | -1.27        | -0.19        | 0.01    |
|                                              | 140-167 days           | -0.82       | -1.37        | -0.27        | <0.001  |
|                                              | 168-195 days           | -0.62       | -1.17        | -0.07        | 0.03    |
|                                              | 196-223 days           | -0.62       | -1.17        | -0.06        | 0.03    |
|                                              | 224-251 days           | -0.68       | -1.24        | -0.12        | 0.02    |
|                                              | 252-279 days           | -0.58       | -1.14        | -0.01        | 0.05    |
|                                              | 280-307 days           | -0.43       | -1.00        | 0.15         | 0.15    |
|                                              | 308-335 days           | -0.55       | -1.13        | 0.03         | 0.07    |
|                                              | 336-363 days           | -0.52       | -1.11        | 0.07         | 0.08    |
|                                              | 363-739 days           | -0.42       | -0.97        | 0.13         | 0.14    |
| >730 days                                    | 0.75                   | -1.22       | 2.72         | 0.45         |         |
| Number of days between                       | <28 days               |             |              |              |         |
|                                              | 28-55 days             | -0.24       | -0.44        | -0.04        | 0.02    |
|                                              | 56-83 days             | -0.03       | -0.29        | 0.22         | 0.79    |

|                           |              |       |       |       |        |
|---------------------------|--------------|-------|-------|-------|--------|
| referral and<br>IA weight | 84-111 days  | -0.26 | -0.53 | 0.01  | 0.06   |
|                           | 112-139 days | -0.31 | -0.62 | 0.00  | 0.05   |
|                           | 140-167 days | -0.26 | -0.61 | 0.08  | 0.13   |
|                           | 168-195 days | -0.69 | -1.08 | -0.29 | 0.00   |
|                           | 196-223 days | -0.61 | -1.02 | -0.21 | 0.00   |
|                           | 224-251 days | -0.20 | -0.66 | 0.26  | 0.40   |
|                           | 252-279 days | -0.65 | -1.15 | -0.15 | 0.01   |
|                           | 280-307 days | -0.12 | -0.66 | 0.42  | 0.65   |
|                           | 308-335 days | -0.80 | -1.38 | -0.23 | 0.01   |
|                           | 336-363 days | -0.79 | -1.47 | -0.11 | 0.02   |
|                           | 363-739 days | 0.01  | -0.33 | 0.35  | 0.95   |
|                           | >730 days    | -0.41 | -0.80 | -0.03 | 0.04   |
|                           | Constant     | 8.04  | 6.07  | 10.02 | <0.001 |

| Random-effects Parameters     | Estimate | Std. Err. | 95% CI<br>lower | 95% CI<br>upper |
|-------------------------------|----------|-----------|-----------------|-----------------|
| Local referral area: Identity |          |           |                 |                 |
| sd(_cons)                     | 0.61     | 0.11      | 0.42            | 0.87            |
| sd(Residual)                  | 4.61     | 0.02      | 4.57            | 4.66            |

**Table S8: Attendance of at least one Intervention Session in the NHS Diabetes Prevention Programme after Initial Assessment using multiple imputation (N=45,507), mixed effects logistic regression**

|                         |                                        | Odds ratio | 95% lower CI | 95% upper CI | P value |
|-------------------------|----------------------------------------|------------|--------------|--------------|---------|
| Pathway**               | ICS Health and Wellbeing (DCA Vantage) |            |              |              |         |
|                         | Living Well Taking Control (Afinion)   | 2.15       | 0.99         | 4.67         | 0.054   |
|                         | Reed Inhouse (A1c Now+)                | 1.54       | 0.67         | 3.53         | 0.311   |
|                         | Reed Lloyds (A1c Now+)                 | 1.21       | 0.51         | 2.87         | 0.66    |
| Sex                     | Male                                   |            |              |              |         |
|                         | Female                                 | 1.11       | 1.06         | 1.15         | <0.001  |
| Age                     | <40                                    |            |              |              |         |
|                         | 40-64                                  | 1.62       | 1.45         | 1.80         | <0.001  |
|                         | 65-74                                  | 2.37       | 2.11         | 2.66         | <0.001  |
|                         | 75+                                    | 1.87       | 1.66         | 2.11         | <0.001  |
| Ethnicity               | White                                  |            |              |              |         |
|                         | Asian                                  | 1.05       | 0.98         | 1.13         | 0.188   |
|                         | black                                  | 1.20       | 1.10         | 1.31         | <0.001  |
|                         | mixed                                  | 1.10       | 0.92         | 1.30         | 0.296   |
|                         | other                                  | 1.09       | 0.88         | 1.35         | 0.447   |
| Deprivation             | IMD 1 (most deprived)                  |            |              |              |         |
|                         | IMD 2                                  | 1.11       | 1.04         | 1.18         | 0.001   |
|                         | IMD 3                                  | 1.28       | 1.20         | 1.37         | <0.001  |
|                         | IMD 4                                  | 1.30       | 1.21         | 1.39         | <0.001  |
|                         | IMD 5 (least deprived)                 | 1.44       | 1.34         | 1.54         | <0.001  |
| BMI                     | Underweight/healthy                    |            |              |              |         |
|                         | Overweight                             | 1.13       | 1.06         | 1.20         | <0.001  |
|                         | Obese                                  | 1.22       | 1.15         | 1.30         | <0.001  |
| HbA1c measurement at IA | NDH ( $\geq 42$ to $< 48$ mmol/mol)    |            |              |              |         |
|                         | Normoglycaemic ( $<42$ mmol/mol)       | 0.71       | 0.68         | 0.74         | <0.001  |
|                         | Diabetes ( $>47$ mmol/mol)*            | 0.35       | 0.32         | 0.38         | <0.001  |

\*Participants with a HbA1c  $> 51$  mmol/mol are taken off the Programme and put on to Type 2 diabetes treatment pathways \*\*For Ingeus, the Initial Assessment is spread across the first intervention session and not comparable to other providers, therefore was not included in the regression analysis
